# Supplementary material for: Wiz binds active promoters and CTCF-binding sites and is required for normal behaviour in the mouse
Source: eLife. 2016 Jul 13;5:e15082. doi: 10.7554/eLife.15082 (PMC4977153; doi:10.7554/eLife.15082)
Supplement: Supplementary file 1. — Wiz ChIP-seq binding peaks (mm10 genome build) identified in adult wildtype cerebellum (n = 2 Wiz ChIP-seq biological replicates, 1 input sample). DOI: http://dx.doi.org/10.7554/eLife.15082.014 [file elife-15082-supp1.xlsx]

## Sheet: Sheet1
Table S1. Wiz ChIP-seq binding peaks (mm10 genome build) identified in adult wildtype cerebellum (n = 2 Wiz ChIP-seq biological replicates, 1 input sample).
Chromosome	Peak Start	Peak End
chr1	3670444	3671550
chr1	3671627	3672656
chr1	4332452	4332888
chr1	4571285	4572240
chr1	4768295	4769141
chr1	4769770	4770392
chr1	4784987	4786055
chr1	4807321	4808307
chr1	4857109	4858715
chr1	4857109	4858715
chr1	5017875	5020619
chr1	5017875	5020619
chr1	5082668	5083678
chr1	6213961	6215624
chr1	6213961	6215624
chr1	6272192	6272615
chr1	6382622	6383262
chr1	6406043	6406807
chr1	6410010	6410415
chr1	6728937	6730199
chr1	6819728	6821179
chr1	6859000	6859427
chr1	7088068	7089627
chr1	7204766	7205201
chr1	7396760	7398985
chr1	7396760	7398985
chr1	7396760	7398985
chr1	9545056	9546606
chr1	9545056	9546606
chr1	9573177	9573679
chr1	9621249	9622083
chr1	9696793	9697178
chr1	9747247	9748852
chr1	9747247	9748852
chr1	9772790	9773246
chr1	9797680	9798065
chr1	9943475	9944839
chr1	10037378	10040390
chr1	10037378	10040390
chr1	10037378	10040390
chr1	10089545	10090059
chr1	10231907	10233551
chr1	10231907	10233551
chr1	10231907	10233551
chr1	11413691	11414843
chr1	11657734	11658104
chr1	12836732	12837227
chr1	12864046	12864424
chr1	12990094	12991262
chr1	12992456	12992947
chr1	13050086	13051138
chr1	13051964	13052388
chr1	13150891	13151891
chr1	13372017	13374786
chr1	13372017	13374786
chr1	13372017	13374786
chr1	13372017	13374786
chr1	13531405	13531923
chr1	13588949	13590629
chr1	13588949	13590629
chr1	13659673	13660895
chr1	13659673	13660895
chr1	13706303	13706715
chr1	13784401	13784758
chr1	13789143	13789668
chr1	14862403	14862783
chr1	15007656	15008008
chr1	15286246	15287562
chr1	15621742	15622338
chr1	15683628	15684037
chr1	15804982	15806655
chr1	15990823	15991620
chr1	15993267	15993964
chr1	16103739	16106573
chr1	16103739	16106573
chr1	16103739	16106573
chr1	16103739	16106573
chr1	16433424	16433792
chr1	16440174	16440526
chr1	16518990	16520231
chr1	16518990	16520231
chr1	16618414	16619874
chr1	16656178	16657724
chr1	16664900	16665989
chr1	16798125	16798889
chr1	17041009	17041819
chr1	17059804	17061129
chr1	17096596	17098213
chr1	17096596	17098213
chr1	17122820	17124092
chr1	17145146	17146330
chr1	17163533	17164022
chr1	18976629	18977239
chr1	20513733	20514072
chr1	20612677	20613323
chr1	20700027	20700406
chr1	20889616	20892077
chr1	20889616	20892077
chr1	20933414	20933957
chr1	20938812	20939451
chr1	20951145	20952165
chr1	21079315	21079904
chr1	21100896	21101918
chr1	21161472	21162204
chr1	21166052	21166810
chr1	21218145	21219787
chr1	21411117	21411916
chr1	21411117	21411916
chr1	21461036	21461513
chr1	21960713	21962226
chr1	22268822	22269574
chr1	22487314	22487709
chr1	22512003	22512904
chr1	22532978	22533701
chr1	22604424	22604890
chr1	22804561	22806025
chr1	23061930	23062488
chr1	23255751	23257734
chr1	23255751	23257734
chr1	23286685	23287184
chr1	23324195	23324546
chr1	23382202	23383148
chr1	23382202	23383148
chr1	23383251	23383600
chr1	23495285	23495807
chr1	23653301	23653989
chr1	23705313	23706021
chr1	23761760	23764057
chr1	23792724	23793650
chr1	23826454	23827704
chr1	23921626	23922220
chr1	24005260	24005838
chr1	24099121	24100922
chr1	24099121	24100922
chr1	24134847	24135292
chr1	24136847	24137724
chr1	24171410	24171908
chr1	24222731	24223632
chr1	24230302	24230714
chr1	24248648	24249712
chr1	24302659	24303083
chr1	24367488	24368098
chr1	24378443	24378951
chr1	24633643	24634144
chr1	24661393	24662068
chr1	24677552	24679412
chr1	24901277	24901688
chr1	25085320	25086391
chr1	25228343	25229358
chr1	25510193	25510876
chr1	25826493	25827818
chr1	25828255	25830188
chr1	25830470	25830839
chr1	28214118	28214800
chr1	30584883	30585236
chr1	30778496	30779077
chr1	30872715	30873283
chr1	30873360	30874546
chr1	30873360	30874546
chr1	30873360	30874546
chr1	30920791	30921107
chr1	30948361	30950411
chr1	30948361	30950411
chr1	31210161	31210499
chr1	32172306	32173200
chr1	33663128	33663667
chr1	33669291	33670795
chr1	33669291	33670795
chr1	33672529	33672929
chr1	33719544	33720594
chr1	33719544	33720594
chr1	33738896	33740329
chr1	33742708	33743251
chr1	33756943	33758289
chr1	33756943	33758289
chr1	33813237	33814995
chr1	33892362	33893344
chr1	33906077	33907783
chr1	33906077	33907783
chr1	33907921	33909212
chr1	33947620	33948311
chr1	33964152	33965445
chr1	33965554	33967440
chr1	34005014	34007364
chr1	34060453	34061462
chr1	34097485	34098712
chr1	34164163	34165426
chr1	34189830	34191225
chr1	34200757	34201866
chr1	34218229	34219148
chr1	34293176	34293834
chr1	34409757	34410474
chr1	34433923	34435582
chr1	34439036	34440524
chr1	34439036	34440524
chr1	34459217	34460646
chr1	34462451	34463689
chr1	34485327	34486453
chr1	34511037	34511679
chr1	34522569	34523885
chr1	34578726	34580532
chr1	34583137	34585488
chr1	34583137	34585488
chr1	34601371	34602826
chr1	34642265	34643141
chr1	34700358	34701365
chr1	34738168	34738997
chr1	34749046	34750560
chr1	34750644	34751727
chr1	34750644	34751727
chr1	34801664	34802692
chr1	34842159	34842774
chr1	34842974	34843666
chr1	34866911	34867580
chr1	34891404	34892011
chr1	34896840	34897376
chr1	35385146	35386099
chr1	35388070	35388602
chr1	35673482	35674308
chr1	35959628	35960235
chr1	36029998	36031179
chr1	36064165	36066126
chr1	36067220	36068415
chr1	36068585	36070835
chr1	36134541	36134968
chr1	36243823	36244656
chr1	36252623	36254234
chr1	36254419	36255273
chr1	36276800	36278016
chr1	36278924	36279942
chr1	36307214	36308407
chr1	36307214	36308407
chr1	36323972	36324451
chr1	36368185	36369537
chr1	36368185	36369537
chr1	36444482	36445775
chr1	36471003	36471502
chr1	36471703	36472773
chr1	36491834	36493044
chr1	36496558	36497653
chr1	36500524	36502094
chr1	36510810	36512245
chr1	36510810	36512245
chr1	36512496	36515098
chr1	36512496	36515098
chr1	36512496	36515098
chr1	36546466	36547914
chr1	36546466	36547914
chr1	36549219	36551230
chr1	36551618	36553829
chr1	36554044	36559151
chr1	36554044	36559151
chr1	36554044	36559151
chr1	36579836	36581448
chr1	36634008	36636966
chr1	36634008	36636966
chr1	36664272	36664969
chr1	36682957	36684548
chr1	36690884	36692246
chr1	36708630	36710407
chr1	36737136	36737765
chr1	36744270	36746028
chr1	36784483	36785808
chr1	36784483	36785808
chr1	36938576	36940400
chr1	36938576	36940400
chr1	37250435	37251221
chr1	37272264	37273481
chr1	37299545	37301131
chr1	37299545	37301131
chr1	37341872	37342319
chr1	37367893	37368672
chr1	37401191	37402801
chr1	37419082	37420084
chr1	37429380	37430840
chr1	37448374	37448769
chr1	37541067	37541709
chr1	37634429	37636150
chr1	37638668	37639779
chr1	37677815	37679175
chr1	37719252	37719733
chr1	37719844	37720330
chr1	37831623	37832067
chr1	37864380	37865948
chr1	37864380	37865948
chr1	37867090	37867455
chr1	37889951	37890927
chr1	37985773	37986196
chr1	37996440	37998719
chr1	37996440	37998719
chr1	38128745	38129698
chr1	38128745	38129698
chr1	38129807	38130850
chr1	38185085	38185958
chr1	38626270	38627254
chr1	38627641	38628463
chr1	38767769	38768407
chr1	38769739	38770595
chr1	38787274	38788227
chr1	38788929	38789333
chr1	38799174	38799729
chr1	38834784	38837018
chr1	38834784	38837018
chr1	38834784	38837018
chr1	38847849	38848377
chr1	38855902	38856764
chr1	38861709	38862693
chr1	38897183	38898418
chr1	38897183	38898418
chr1	38936727	38937213
chr1	38986991	38988662
chr1	39001004	39001764
chr1	39010572	39011342
chr1	39192362	39193860
chr1	39192362	39193860
chr1	39192362	39193860
chr1	39340399	39341288
chr1	39367129	39368867
chr1	39391711	39393110
chr1	39445835	39447102
chr1	39476880	39479099
chr1	39476880	39479099
chr1	39504285	39504563
chr1	39515558	39516487
chr1	39522323	39523481
chr1	39527222	39527919
chr1	39529780	39531381
chr1	39535004	39536538
chr1	39576361	39577777
chr1	39576361	39577777
chr1	39576361	39577777
chr1	39614895	39615480
chr1	39650350	39651503
chr1	39685629	39686376
chr1	39761029	39762000
chr1	39899690	39900883
chr1	39901129	39903056
chr1	39901129	39903056
chr1	39910848	39912123
chr1	39936326	39937244
chr1	40000521	40001351
chr1	40085460	40086322
chr1	40115198	40115856
chr1	40116036	40116745
chr1	40378536	40379631
chr1	42684441	42685213
chr1	42691248	42691643
chr1	42714177	42715509
chr1	42850851	42851739
chr1	42915031	42915463
chr1	42952704	42953823
chr1	43065889	43066301
chr1	43091902	43093208
chr1	43091902	43093208
chr1	43098162	43099292
chr1	43110536	43111175
chr1	43139528	43140199
chr1	43264380	43264851
chr1	43299439	43299860
chr1	43445213	43447112
chr1	43445213	43447112
chr1	43445213	43447112
chr1	43635748	43636080
chr1	43826717	43828416
chr1	43826717	43828416
chr1	43898780	43899950
chr1	43933153	43934816
chr1	43933153	43934816
chr1	44041733	44042215
chr1	44102008	44102845
chr1	44118247	44120732
chr1	44118247	44120732
chr1	44118247	44120732
chr1	44147558	44149137
chr1	45794802	45796087
chr1	45816685	45817330
chr1	45825079	45825545
chr1	46849737	46850202
chr1	46852553	46854634
chr1	46852553	46854634
chr1	46852553	46854634
chr1	47277740	47278371
chr1	48532988	48534031
chr1	48733072	48734212
chr1	48916189	48916844
chr1	50926233	50928331
chr1	50926233	50928331
chr1	50926233	50928331
chr1	50962286	50962841
chr1	51243057	51244186
chr1	51333511	51334596
chr1	51458903	51459474
chr1	51477635	51478991
chr1	51596819	51597751
chr1	51600426	51600804
chr1	51615224	51616413
chr1	51644431	51644873
chr1	51670889	51671835
chr1	51944517	51945240
chr1	51998542	51998979
chr1	52004045	52004522
chr1	52098704	52099278
chr1	52113136	52114349
chr1	52118462	52120025
chr1	52145954	52147349
chr1	52149361	52151396
chr1	52149361	52151396
chr1	52169957	52170661
chr1	52231875	52233779
chr1	52231875	52233779
chr1	52231875	52233779
chr1	52267204	52268471
chr1	52270188	52270683
chr1	52299442	52300026
chr1	52302618	52303059
chr1	52499439	52500159
chr1	52500632	52501076
chr1	52520987	52521879
chr1	52630322	52631391
chr1	52648037	52648797
chr1	52726103	52727924
chr1	52726103	52727924
chr1	52748261	52748759
chr1	52816476	52818085
chr1	52844546	52845904
chr1	52952224	52953608
chr1	52952224	52953608
chr1	53032594	53032918
chr1	53053062	53053726
chr1	53092943	53093573
chr1	53272638	53273111
chr1	53296553	53297876
chr1	53313169	53314032
chr1	53313169	53314032
chr1	53352317	53353104
chr1	53908934	53909467
chr1	54039079	54039535
chr1	54193780	54194581
chr1	54194680	54195646
chr1	54250011	54251227
chr1	54381030	54381879
chr1	54438489	54439403
chr1	54556901	54558534
chr1	54556901	54558534
chr1	54665650	54666357
chr1	54925531	54926925
chr1	54925531	54926925
chr1	55026275	55027884
chr1	55052091	55053737
chr1	55086771	55088800
chr1	55086771	55088800
chr1	55130874	55131975
chr1	55236817	55238500
chr1	55239228	55239664
chr1	55363212	55363882
chr1	55383124	55383553
chr1	55404341	55404980
chr1	55405155	55407027
chr1	55736163	55736752
chr1	55755758	55756112
chr1	55838183	55838573
chr1	55874167	55874996
chr1	55886408	55886740
chr1	55960325	55960787
chr1	56972042	56973919
chr1	56972042	56973919
chr1	56972042	56973919
chr1	56976193	56977950
chr1	57205604	57206050
chr1	57377434	57378529
chr1	57377434	57378529
chr1	57405727	57407457
chr1	57428603	57429321
chr1	57969313	57970636
chr1	58029619	58031648
chr1	58029619	58031648
chr1	58112522	58113331
chr1	58271186	58271511
chr1	58391952	58393364
chr1	58422947	58424297
chr1	58445020	58445801
chr1	58504130	58505250
chr1	58584274	58584646
chr1	58585568	58586951
chr1	58585568	58586951
chr1	58652201	58653282
chr1	58677382	58678151
chr1	58697620	58698075
chr1	58711057	58711989
chr1	58713214	58713730
chr1	58746607	58747608
chr1	58972879	58974530
chr1	59119390	59120803
chr1	59119390	59120803
chr1	59144485	59145106
chr1	59215110	59216311
chr1	59236701	59238583
chr1	59236701	59238583
chr1	59236701	59238583
chr1	59247493	59248088
chr1	59312205	59313434
chr1	59316097	59317231
chr1	59375955	59377702
chr1	59375955	59377702
chr1	59415491	59416365
chr1	59481445	59485809
chr1	59481445	59485809
chr1	59481445	59485809
chr1	59541176	59541842
chr1	59583914	59585675
chr1	59613804	59614237
chr1	59623142	59624046
chr1	59670012	59671596
chr1	59670012	59671596
chr1	59684859	59685405
chr1	59762319	59764248
chr1	59762319	59764248
chr1	59764392	59764908
chr1	59883700	59884478
chr1	59912385	59914542
chr1	59912385	59914542
chr1	59912385	59914542
chr1	60042350	60043004
chr1	60097554	60098849
chr1	60179992	60181291
chr1	60342616	60343823
chr1	60408734	60410367
chr1	60408734	60410367
chr1	60408734	60410367
chr1	60428905	60429317
chr1	60565224	60566833
chr1	60565224	60566833
chr1	60566987	60567543
chr1	60860150	60861664
chr1	61181041	61181707
chr1	61297947	61298439
chr1	61376732	61377591
chr1	61771313	61771624
chr1	62696848	62697381
chr1	62701020	62701717
chr1	62702779	62703928
chr1	62705701	62707835
chr1	62705701	62707835
chr1	62722539	62722913
chr1	62776963	62778173
chr1	62783848	62784400
chr1	62785772	62787128
chr1	62929300	62930065
chr1	62964237	62964886
chr1	62966693	62967475
chr1	62984365	62985236
chr1	62986198	62986726
chr1	63112714	63114008
chr1	63112714	63114008
chr1	63114097	63115338
chr1	63114097	63115338
chr1	63176173	63177833
chr1	63180699	63181862
chr1	63182119	63183226
chr1	63182119	63183226
chr1	63445000	63446916
chr1	63445000	63446916
chr1	63458098	63458668
chr1	63479026	63479389
chr1	63657978	63659942
chr1	63657978	63659942
chr1	63668474	63669099
chr1	63729808	63730998
chr1	63763053	63763934
chr1	63869340	63869729
chr1	63953381	63953847
chr1	64078241	64079615
chr1	64087673	64088535
chr1	64118752	64119821
chr1	64119937	64121492
chr1	64121580	64123015
chr1	64164480	64165101
chr1	64225272	64227145
chr1	64445217	64446450
chr1	64446664	64448736
chr1	64531884	64533295
chr1	64531884	64533295
chr1	64531884	64533295
chr1	64533483	64534189
chr1	64616551	64618184
chr1	64616551	64618184
chr1	64690309	64691791
chr1	64690309	64691791
chr1	64705123	64705634
chr1	64717358	64717990
chr1	64734697	64736765
chr1	64734697	64736765
chr1	64737046	64737795
chr1	64918688	64919685
chr1	64956325	64957302
chr1	64956325	64957302
chr1	64986175	64986518
chr1	65009974	65010657
chr1	65111585	65112616
chr1	65177971	65180402
chr1	65177971	65180402
chr1	65177971	65180402
chr1	65185563	65187265
chr1	65185563	65187265
chr1	65185563	65187265
chr1	65282763	65283240
chr1	65311392	65313248
chr1	65311392	65313248
chr1	65548704	65549396
chr1	66099860	66100196
chr1	66104502	66104920
chr1	66105213	66105648
chr1	66174734	66175830
chr1	66174734	66175830
chr1	66174734	66175830
chr1	66407544	66407989
chr1	66467785	66469348
chr1	66467785	66469348
chr1	66700614	66701520
chr1	66816046	66818239
chr1	66816046	66818239
chr1	66816046	66818239
chr1	66816046	66818239
chr1	66838358	66838944
chr1	66941040	66941335
chr1	67038146	67039001
chr1	67061409	67061878
chr1	67181211	67181535
chr1	68106442	68106878
chr1	69105716	69108192
chr1	69105716	69108192
chr1	69138831	69139514
chr1	69241743	69242169
chr1	69688860	69689500
chr1	69790285	69790768
chr1	71556817	71557897
chr1	72123478	72124143
chr1	72141881	72142350
chr1	72211370	72213012
chr1	72211370	72213012
chr1	72219869	72220492
chr1	72243220	72244647
chr1	72254526	72255628
chr1	72283874	72284913
chr1	72306533	72307928
chr1	72306533	72307928
chr1	72313428	72314217
chr1	72400225	72401064
chr1	72558475	72559325
chr1	72575161	72575927
chr1	72582773	72584098
chr1	72710708	72712061
chr1	72710708	72712061
chr1	72716767	72718285
chr1	72718678	72719550
chr1	72739082	72739737
chr1	72854276	72856767
chr1	72865649	72866929
chr1	72871507	72872458
chr1	72873270	72875583
chr1	72875838	72876866
chr1	72876996	72879480
chr1	72992698	72993511
chr1	73075484	73076255
chr1	73618478	73619009
chr1	73716293	73717899
chr1	73716293	73717899
chr1	73726526	73727188
chr1	73825577	73827035
chr1	73901273	73903300
chr1	73901273	73903300
chr1	73912272	73912781
chr1	73986605	73987042
chr1	73996285	73997053
chr1	74082576	74083527
chr1	74124611	74125917
chr1	74205602	74206545
chr1	74235709	74237427
chr1	74235709	74237427
chr1	74235709	74237427
chr1	74283865	74288239
chr1	74283865	74288239
chr1	74283865	74288239
chr1	74303537	74304580
chr1	74313056	74313803
chr1	74331407	74333315
chr1	74361781	74362868
chr1	74386424	74388023
chr1	74389195	74393679
chr1	74389195	74393679
chr1	74389195	74393679
chr1	74396957	74398847
chr1	74396957	74398847
chr1	74396957	74398847
chr1	74452589	74453155
chr1	74460277	74460598
chr1	74505443	74507360
chr1	74505443	74507360
chr1	74586981	74588656
chr1	74600949	74601759
chr1	74661381	74662553
chr1	74784105	74784953
chr1	74787742	74789202
chr1	74802744	74803959
chr1	74806390	74808686
chr1	74815797	74817616
chr1	74815797	74817616
chr1	74854077	74857121
chr1	74854077	74857121
chr1	74854077	74857121
chr1	74857320	74859287
chr1	74880619	74881872
chr1	74892560	74896183
chr1	74892560	74896183
chr1	74892560	74896183
chr1	74892560	74896183
chr1	74892560	74896183
chr1	74926641	74927216
chr1	74947947	74951161
chr1	74964438	74964869
chr1	75016748	75017340
chr1	75123769	75125642
chr1	75140934	75143575
chr1	75140934	75143575
chr1	75168249	75169417
chr1	75179554	75180544
chr1	75179554	75180544
chr1	75190998	75192797
chr1	75210334	75211791
chr1	75216738	75220461
chr1	75216738	75220461
chr1	75234593	75235448
chr1	75235625	75237629
chr1	75235625	75237629
chr1	75247861	75248536
chr1	75250502	75255454
chr1	75250502	75255454
chr1	75250502	75255454
chr1	75250502	75255454
chr1	75263182	75265049
chr1	75290529	75291627
chr1	75316550	75318600
chr1	75316550	75318600
chr1	75342386	75343693
chr1	75369500	75371006
chr1	75371230	75372188
chr1	75381420	75383191
chr1	75381420	75383191
chr1	75381420	75383191
chr1	75387311	75390037
chr1	75398113	75400403
chr1	75412805	75414536
chr1	75412805	75414536
chr1	75421754	75423619
chr1	75424599	75427246
chr1	75441138	75443993
chr1	75441138	75443993
chr1	75444169	75447806
chr1	75444169	75447806
chr1	75444169	75447806
chr1	75456760	75457295
chr1	75466987	75468566
chr1	75475937	75480421
chr1	75475937	75480421
chr1	75475937	75480421
chr1	75475937	75480421
chr1	75487457	75488686
chr1	75487457	75488686
chr1	75494861	75496169
chr1	75505007	75506982
chr1	75521038	75522000
chr1	75545410	75547730
chr1	75545410	75547730
chr1	75558356	75561961
chr1	75572712	75573359
chr1	75596957	75598053
chr1	75652503	75654341
chr1	75652503	75654341
chr1	75847504	75848032
chr1	75925604	75926209
chr1	76737622	76738076
chr1	77515327	77517070
chr1	77943142	77943462
chr1	77978708	77979122
chr1	78215684	78217025
chr1	78309912	78311499
chr1	78371322	78372599
chr1	78419434	78420154
chr1	78454362	78455034
chr1	78488315	78489569
chr1	78525217	78525724
chr1	78536810	78537884
chr1	78657439	78658968
chr1	78724216	78725366
chr1	78725789	78726161
chr1	79439664	79440422
chr1	79640124	79640563
chr1	79760778	79762247
chr1	79775864	79776547
chr1	80180887	80181514
chr1	80339309	80340746
chr1	80339309	80340746
chr1	80340843	80341813
chr1	80408464	80408954
chr1	80427311	80428044
chr1	81287136	81287595
chr1	81301734	81302070
chr1	81316480	81317272
chr1	82282701	82284239
chr1	82287174	82293289
chr1	82287174	82293289
chr1	82287174	82293289
chr1	82287174	82293289
chr1	82287174	82293289
chr1	82294090	82294553
chr1	82315733	82317113
chr1	82433355	82433791
chr1	82641454	82642055
chr1	82724191	82725873
chr1	82787325	82787821
chr1	82838740	82840572
chr1	82838740	82840572
chr1	82987824	82988176
chr1	83076142	83076509
chr1	83181228	83181822
chr1	83222999	83223838
chr1	83406399	83408865
chr1	83406399	83408865
chr1	83505039	83505779
chr1	83716682	83717437
chr1	83727107	83727632
chr1	83746011	83746418
chr1	84283855	84285240
chr1	84286396	84287242
chr1	84581751	84582436
chr1	84694997	84697755
chr1	84694997	84697755
chr1	84838596	84840535
chr1	84838596	84840535
chr1	84838596	84840535
chr1	84933400	84935987
chr1	84933400	84935987
chr1	84933400	84935987
chr1	85114763	85115073
chr1	85581490	85581959
chr1	85736456	85736899
chr1	85792996	85794796
chr1	85792996	85794796
chr1	85792996	85794796
chr1	85852821	85854279
chr1	85894303	85896156
chr1	85894303	85896156
chr1	85894303	85896156
chr1	85935274	85936103
chr1	86007622	86008222
chr1	86017999	86018959
chr1	86046154	86046660
chr1	86058945	86060814
chr1	86063469	86065428
chr1	86063469	86065428
chr1	86153912	86155092
chr1	86178703	86179917
chr1	86213925	86214582
chr1	86339331	86339992
chr1	86358602	86360475
chr1	86358602	86360475
chr1	86389164	86390208
chr1	86415489	86417046
chr1	86415489	86417046
chr1	86429828	86430589
chr1	86433985	86435909
chr1	86433985	86435909
chr1	86433985	86435909
chr1	86439426	86443779
chr1	86439426	86443779
chr1	86470638	86472916
chr1	86470638	86472916
chr1	86486398	86488642
chr1	86486398	86488642
chr1	86499786	86505769
chr1	86499786	86505769
chr1	86499786	86505769
chr1	86499786	86505769
chr1	86499786	86505769
chr1	86499786	86505769
chr1	86509316	86509948
chr1	86520373	86521113
chr1	86522338	86523103
chr1	86524393	86530106
chr1	86524393	86530106
chr1	86524393	86530106
chr1	86524393	86530106
chr1	86524393	86530106
chr1	86524393	86530106
chr1	86524393	86530106
chr1	86524393	86530106
chr1	86531758	86533014
chr1	86582111	86583081
chr1	86586811	86587539
chr1	86618484	86618846
chr1	86650218	86650966
chr1	86668962	86671079
chr1	86668962	86671079
chr1	86668962	86671079
chr1	86703235	86704406
chr1	87020540	87021175
chr1	87040718	87043016
chr1	87040718	87043016
chr1	87040718	87043016
chr1	87098485	87098985
chr1	87174207	87174858
chr1	87184249	87188275
chr1	87184249	87188275
chr1	87184249	87188275
chr1	87184249	87188275
chr1	87184249	87188275
chr1	87213361	87214713
chr1	87213361	87214713
chr1	87217944	87218432
chr1	87245953	87246748
chr1	87326333	87328097
chr1	87326333	87328097
chr1	87418677	87419259
chr1	87447251	87448103
chr1	87468233	87468854
chr1	87486439	87487177
chr1	87509303	87510326
chr1	87608228	87609275
chr1	87721417	87721843
chr1	87755267	87756886
chr1	87766173	87766669
chr1	87852950	87855415
chr1	87852950	87855415
chr1	87852950	87855415
chr1	87922666	87923248
chr1	87936345	87937340
chr1	88007899	88008699
chr1	88120356	88121212
chr1	88144091	88144744
chr1	88204831	88206184
chr1	88277126	88278044
chr1	88318166	88319241
chr1	88348175	88349170
chr1	88356207	88358796
chr1	88356207	88358796
chr1	88356207	88358796
chr1	88367276	88367613
chr1	88424600	88425283
chr1	88456615	88457260
chr1	88562327	88562743
chr1	88700952	88702725
chr1	88700952	88702725
chr1	88700952	88702725
chr1	88705144	88706828
chr1	88705144	88706828
chr1	88742204	88743298
chr1	88744994	88745775
chr1	88756604	88757192
chr1	89069424	89071207
chr1	89191192	89193218
chr1	89195672	89196694
chr1	89235057	89235940
chr1	89308637	89309219
chr1	89344502	89345211
chr1	89364887	89365468
chr1	89453917	89457450
chr1	89453917	89457450
chr1	89453917	89457450
chr1	89453917	89457450
chr1	89500633	89501942
chr1	89524293	89526782
chr1	89524293	89526782
chr1	89575047	89577418
chr1	89579848	89582928
chr1	89579848	89582928
chr1	89579848	89582928
chr1	89583141	89583825
chr1	89605801	89608416
chr1	89626892	89628524
chr1	89631763	89632676
chr1	89643853	89644581
chr1	89645764	89647221
chr1	89676147	89676795
chr1	89859942	89860955
chr1	89940314	89940790
chr1	89941790	89944009
chr1	90060558	90061102
chr1	90201846	90203166
chr1	90203368	90204444
chr1	90588205	90588764
chr1	90592803	90593270
chr1	90603059	90603904
chr1	90650440	90651342
chr1	90840241	90840615
chr1	90906260	90907270
chr1	90928015	90929052
chr1	90956366	90957547
chr1	90972987	90974393
chr1	90998569	90999285
chr1	91098757	91099330
chr1	91178980	91180370
chr1	91210799	91211865
chr1	91249536	91251565
chr1	91249536	91251565
chr1	91297731	91299153
chr1	91344881	91347423
chr1	91366101	91366836
chr1	91380283	91380938
chr1	91397904	91399386
chr1	91397904	91399386
chr1	91412116	91414588
chr1	91412116	91414588
chr1	91428604	91429090
chr1	91458261	91460418
chr1	91483134	91483929
chr1	91523478	91524263
chr1	91539725	91541636
chr1	91600501	91601282
chr1	91755137	91755611
chr1	91873818	91875253
chr1	91913816	91914291
chr1	91941994	91942555
chr1	91961880	91962641
chr1	91968822	91969581
chr1	91978455	91978888
chr1	92179060	92179827
chr1	92180188	92181609
chr1	92264747	92265527
chr1	92360116	92361203
chr1	92436660	92438375
chr1	92453268	92454445
chr1	92473166	92474534
chr1	92521022	92522036
chr1	92610887	92611481
chr1	92640959	92642572
chr1	92647415	92649306
chr1	92647415	92649306
chr1	92696503	92697724
chr1	92831676	92835041
chr1	92831676	92835041
chr1	92831676	92835041
chr1	92831676	92835041
chr1	92831676	92835041
chr1	92831676	92835041
chr1	92839595	92840918
chr1	92879008	92880132
chr1	92894867	92895885
chr1	92906672	92908242
chr1	92908681	92912642
chr1	92908681	92912642
chr1	92933935	92935283
chr1	92956546	92957299
chr1	93010652	93011565
chr1	93013851	93015735
chr1	93072455	93073197
chr1	93079963	93081481
chr1	93083287	93083968
chr1	93100087	93102890
chr1	93100087	93102890
chr1	93100087	93102890
chr1	93100087	93102890
chr1	93114795	93115469
chr1	93128186	93129473
chr1	93173624	93175766
chr1	93223958	93224525
chr1	93234982	93237467
chr1	93234982	93237467
chr1	93305442	93306172
chr1	93342566	93344127
chr1	93342566	93344127
chr1	93444470	93446073
chr1	93444470	93446073
chr1	93477622	93479956
chr1	93477622	93479956
chr1	93511359	93512752
chr1	93511359	93512752
chr1	93634723	93636706
chr1	93634723	93636706
chr1	93668656	93669111
chr1	93686142	93687024
chr1	93726840	93727809
chr1	93753719	93755593
chr1	93753719	93755593
chr1	93753719	93755593
chr1	93801347	93804883
chr1	93801347	93804883
chr1	93824318	93826923
chr1	93832489	93833143
chr1	93838686	93839080
chr1	93845810	93846356
chr1	93909160	93909646
chr1	93911061	93911509
chr1	93911651	93912294
chr1	93978246	93978779
chr1	93980783	93981325
chr1	94034575	94035965
chr1	94078800	94079681
chr1	95313321	95314788
chr1	97660582	97662406
chr1	97660582	97662406
chr1	97660582	97662406
chr1	97688817	97689169
chr1	97769176	97771036
chr1	97976859	97977368
chr1	98350302	98350609
chr1	100223921	100224335
chr1	104768770	104769695
chr1	104944757	104945158
chr1	104986196	104986668
chr1	105001806	105002984
chr1	105354704	105357464
chr1	105630439	105630940
chr1	105659706	105660433
chr1	105663091	105664738
chr1	105663091	105664738
chr1	105780230	105780687
chr1	105780765	105781340
chr1	105891080	105891762
chr1	105905965	105906750
chr1	105989703	105990885
chr1	105990981	105992412
chr1	105993206	105994279
chr1	105993206	105994279
chr1	106036854	106038129
chr1	106042967	106043981
chr1	106070789	106072307
chr1	106170611	106172138
chr1	106170611	106172138
chr1	106172235	106173668
chr1	106172235	106173668
chr1	106389752	106390163
chr1	106395249	106396110
chr1	106424743	106425948
chr1	106511583	106511978
chr1	106711907	106712837
chr1	106713412	106714304
chr1	106717027	106717585
chr1	106735566	106736011
chr1	106758825	106760433
chr1	106758825	106760433
chr1	106795958	106796972
chr1	107243113	107243643
chr1	107481438	107481903
chr1	107565377	107566006
chr1	107589964	107590764
chr1	107593269	107593880
chr1	107598250	107598897
chr1	109932668	109933093
chr1	109982157	109983856
chr1	109982157	109983856
chr1	109982157	109983856
chr1	109985287	109985883
chr1	111863930	111865259
chr1	111863930	111865259
chr1	111863930	111865259
chr1	112378547	112379222
chr1	112388747	112389206
chr1	112451594	112452103
chr1	114330231	114330905
chr1	114862712	114863363
chr1	118310832	118311638
chr1	118320791	118322345
chr1	118388110	118390339
chr1	118388110	118390339
chr1	118458722	118460084
chr1	118458722	118460084
chr1	118458722	118460084
chr1	118476760	118477281
chr1	118497971	118498737
chr1	118759388	118760142
chr1	118768335	118769770
chr1	118772153	118772646
chr1	118864563	118865322
chr1	119053271	119054417
chr1	119082370	119083090
chr1	119083225	119084191
chr1	119087154	119088056
chr1	119093340	119094983
chr1	119256121	119257353
chr1	119291939	119292770
chr1	119423540	119423955
chr1	119457961	119458661
chr1	119463442	119463812
chr1	119484340	119484824
chr1	119494753	119495812
chr1	119503988	119505312
chr1	119524918	119527150
chr1	119548575	119549530
chr1	119648305	119649259
chr1	119836670	119838045
chr1	119836670	119838045
chr1	119836670	119838045
chr1	119894698	119895612
chr1	119912788	119913601
chr1	119929527	119930267
chr1	120012905	120013543
chr1	120032407	120033589
chr1	120092994	120094306
chr1	120092994	120094306
chr1	120098316	120098898
chr1	120115211	120116158
chr1	120120007	120121849
chr1	120120007	120121849
chr1	120155156	120155754
chr1	120197150	120197628
chr1	120327687	120328088
chr1	120549224	120550518
chr1	120586318	120587054
chr1	121180201	121180804
chr1	121326986	121328424
chr1	121431020	121431964
chr1	121440710	121441390
chr1	121567277	121568455
chr1	124041541	124041957
chr1	124045643	124046404
chr1	125370593	125371491
chr1	125434597	125436404
chr1	125434597	125436404
chr1	125559967	125561608
chr1	125559967	125561608
chr1	125559967	125561608
chr1	125607110	125607869
chr1	125789387	125790247
chr1	126407805	126408246
chr1	126431608	126432074
chr1	126931702	126932320
chr1	126993125	126993682
chr1	127203315	127203717
chr1	127204680	127206721
chr1	127204680	127206721
chr1	127458911	127459530
chr1	127484059	127485545
chr1	127496765	127497596
chr1	127499611	127501000
chr1	127541111	127542414
chr1	127676078	127678684
chr1	127676078	127678684
chr1	127676078	127678684
chr1	127679218	127680251
chr1	127773354	127775033
chr1	127868599	127869325
chr1	128102569	128104119
chr1	128102569	128104119
chr1	128102569	128104119
chr1	128243785	128245151
chr1	128303878	128304577
chr1	128416618	128417700
chr1	128824246	128824669
chr1	128832472	128832909
chr1	128875145	128875750
chr1	130350301	130350676
chr1	130372129	130372540
chr1	130462088	130462938
chr1	130715337	130718107
chr1	130715337	130718107
chr1	130715337	130718107
chr1	130715337	130718107
chr1	130796925	130797364
chr1	130874875	130876622
chr1	130876797	130877656
chr1	130979390	130979820
chr1	131053066	131054420
chr1	131096625	131098116
chr1	131096625	131098116
chr1	131115408	131117406
chr1	131115408	131117406
chr1	131115408	131117406
chr1	131138072	131139074
chr1	131138072	131139074
chr1	131152923	131153580
chr1	131155209	131155878
chr1	131181213	131182566
chr1	131244057	131246742
chr1	131244057	131246742
chr1	131244057	131246742
chr1	131244057	131246742
chr1	131260051	131261056
chr1	131269743	131271262
chr1	131269743	131271262
chr1	131290388	131291239
chr1	131293320	131294391
chr1	131295944	131298178
chr1	131295944	131298178
chr1	131310139	131311191
chr1	131524828	131528612
chr1	131524828	131528612
chr1	131524828	131528612
chr1	131524828	131528612
chr1	131524828	131528612
chr1	131554817	131555570
chr1	131613308	131613964
chr1	131657863	131658847
chr1	131708264	131708815
chr1	131711205	131713217
chr1	131765001	131766394
chr1	131827060	131829025
chr1	131827060	131829025
chr1	131846066	131847529
chr1	131867011	131868133
chr1	131909810	131911729
chr1	131909810	131911729
chr1	131909810	131911729
chr1	131909810	131911729
chr1	131937616	131938233
chr1	131981151	131983658
chr1	131981151	131983658
chr1	131981151	131983658
chr1	131981151	131983658
chr1	131994860	131995353
chr1	132007190	132008462
chr1	132007190	132008462
chr1	132046033	132047524
chr1	132067073	132068256
chr1	132095215	132096155
chr1	132115498	132117721
chr1	132120728	132122299
chr1	132138695	132140707
chr1	132155074	132158581
chr1	132155074	132158581
chr1	132155074	132158581
chr1	132198184	132201192
chr1	132198184	132201192
chr1	132210900	132212758
chr1	132210900	132212758
chr1	132237223	132238128
chr1	132298218	132300011
chr1	132298218	132300011
chr1	132306146	132307035
chr1	132312230	132313247
chr1	132315778	132316566
chr1	132355110	132356519
chr1	132364780	132365434
chr1	132365938	132368356
chr1	132381907	132382696
chr1	132389883	132391620
chr1	132389883	132391620
chr1	132389883	132391620
chr1	132391732	132392319
chr1	132417184	132418328
chr1	132476646	132477703
chr1	132476646	132477703
chr1	132523297	132524457
chr1	132524902	132527087
chr1	132527972	132529577
chr1	132537328	132538316
chr1	132541670	132543330
chr1	132541670	132543330
chr1	132568603	132572729
chr1	132568603	132572729
chr1	132568603	132572729
chr1	132593870	132595523
chr1	132608246	132609978
chr1	132655555	132656172
chr1	132738864	132739689
chr1	132739982	132742135
chr1	132757980	132759961
chr1	132757980	132759961
chr1	132770845	132771874
chr1	132802267	132802933
chr1	132879257	132882686
chr1	132879257	132882686
chr1	132879257	132882686
chr1	132879257	132882686
chr1	132934550	132935475
chr1	132938045	132939740
chr1	132968537	132969319
chr1	132982338	132983703
chr1	133024822	133025781
chr1	133039136	133040063
chr1	133045595	133047143
chr1	133087416	133088778
chr1	133100810	133101800
chr1	133130747	133133440
chr1	133145900	133146672
chr1	133176710	133179442
chr1	133180678	133182020
chr1	133180678	133182020
chr1	133306734	133307770
chr1	133306734	133307770
chr1	133314256	133314754
chr1	133353164	133354233
chr1	133379844	133383323
chr1	133379844	133383323
chr1	133385390	133386154
chr1	133609646	133611048
chr1	133660404	133661664
chr1	133735818	133737076
chr1	133767650	133768610
chr1	133873057	133873399
chr1	133895660	133897244
chr1	133910355	133912108
chr1	133961379	133962333
chr1	134045243	134046352
chr1	134048589	134049640
chr1	134053169	134053868
chr1	134059715	134061726
chr1	134059715	134061726
chr1	134077254	134079668
chr1	134077254	134079668
chr1	134077254	134079668
chr1	134077254	134079668
chr1	134077254	134079668
chr1	134092423	134093931
chr1	134106732	134107483
chr1	134119888	134120780
chr1	134150723	134152280
chr1	134154693	134155216
chr1	134189116	134189536
chr1	134195270	134197162
chr1	134201681	134203584
chr1	134232307	134235430
chr1	134232307	134235430
chr1	134232307	134235430
chr1	134243752	134245760
chr1	134272749	134276559
chr1	134272749	134276559
chr1	134272749	134276559
chr1	134290584	134292192
chr1	134297255	134298165
chr1	134322368	134323544
chr1	134331084	134333298
chr1	134331084	134333298
chr1	134335034	134336814
chr1	134335034	134336814
chr1	134341508	134345280
chr1	134341508	134345280
chr1	134341508	134345280
chr1	134361142	134362324
chr1	134361142	134362324
chr1	134405690	134406413
chr1	134414301	134416303
chr1	134414301	134416303
chr1	134450990	134451356
chr1	134454871	134455966
chr1	134454871	134455966
chr1	134494355	134495366
chr1	134494355	134495366
chr1	134518372	134519528
chr1	134556236	134557327
chr1	134556236	134557327
chr1	134559881	134561524
chr1	134559881	134561524
chr1	134636669	134637112
chr1	134637975	134639006
chr1	134646000	134647450
chr1	134646000	134647450
chr1	134674259	134674694
chr1	134699074	134700507
chr1	134704172	134705939
chr1	134708593	134711312
chr1	134708593	134711312
chr1	134708593	134711312
chr1	134713519	134715692
chr1	134722452	134723723
chr1	134725005	134725850
chr1	134745303	134746496
chr1	134829507	134830134
chr1	134847504	134848446
chr1	134854233	134854918
chr1	134955283	134956284
chr1	134962229	134963221
chr1	134962229	134963221
chr1	134987211	134988310
chr1	134989335	134990118
chr1	135105875	135106590
chr1	135108530	135111554
chr1	135108530	135111554
chr1	135108530	135111554
chr1	135108530	135111554
chr1	135108530	135111554
chr1	135111816	135113274
chr1	135111816	135113274
chr1	135132188	135133093
chr1	135136079	135137364
chr1	135146014	135146738
chr1	135146871	135148487
chr1	135146871	135148487
chr1	135153581	135155010
chr1	135167474	135167808
chr1	135171688	135172589
chr1	135258170	135259674
chr1	135271198	135272183
chr1	135283091	135284402
chr1	135313114	135314139
chr1	135313114	135314139
chr1	135367614	135369522
chr1	135367614	135369522
chr1	135374232	135375791
chr1	135429768	135431110
chr1	135460607	135461872
chr1	135540089	135541036
chr1	135540089	135541036
chr1	135544334	135545834
chr1	135604497	135605179
chr1	135669752	135671782
chr1	135687605	135688621
chr1	135699263	135699769
chr1	135700573	135701057
chr1	135719177	135720532
chr1	135752736	135753822
chr1	135781123	135781711
chr1	135789755	135791405
chr1	135811041	135811785
chr1	135864837	135866038
chr1	135882707	135883167
chr1	135944233	135946600
chr1	135944233	135946600
chr1	135944233	135946600
chr1	135958160	135959120
chr1	135969665	135971260
chr1	136017406	136018765
chr1	136045790	136046469
chr1	136047061	136047812
chr1	136050422	136052980
chr1	136075807	136076944
chr1	136131030	136132298
chr1	136139793	136140914
chr1	136169960	136170756
chr1	136174881	136175961
chr1	136259666	136261655
chr1	136259666	136261655
chr1	136306441	136307131
chr1	136344912	136346552
chr1	136344912	136346552
chr1	136414364	136415805
chr1	136458593	136459373
chr1	136521389	136521675
chr1	136550724	136551451
chr1	136624447	136626554
chr1	136624447	136626554
chr1	136624447	136626554
chr1	136624447	136626554
chr1	137323810	137324325
chr1	137330430	137331051
chr1	137331736	137332395
chr1	138044432	138045009
chr1	138328297	138328694
chr1	138617648	138618443
chr1	138619027	138619937
chr1	138835342	138835897
chr1	138856145	138856862
chr1	138901472	138902044
chr1	138962946	138964514
chr1	139267793	139268203
chr1	139421688	139422879
chr1	139421688	139422879
chr1	143701851	143703448
chr1	143701851	143703448
chr1	143701851	143703448
chr1	143738877	143740472
chr1	143776334	143778023
chr1	143803547	143803951
chr1	143813717	143814489
chr1	144003516	144004900
chr1	144006528	144006967
chr1	144406613	144407026
chr1	145806408	145806871
chr1	146497341	146498838
chr1	149758482	149758837
chr1	150392278	150394015
chr1	150540244	150540659
chr1	150591269	150591769
chr1	150779871	150780564
chr1	150920080	150920652
chr1	151035022	151035394
chr1	151078837	151079638
chr1	151343551	151345725
chr1	151343551	151345725
chr1	151427907	151429584
chr1	151427907	151429584
chr1	151499870	151501437
chr1	151499870	151501437
chr1	151499870	151501437
chr1	151564378	151564796
chr1	151705764	151706626
chr1	151754802	151756081
chr1	151754802	151756081
chr1	151820244	151820947
chr1	151846306	151846766
chr1	151986137	151986758
chr1	152088645	152091304
chr1	152088645	152091304
chr1	152088645	152091304
chr1	152088645	152091304
chr1	152088645	152091304
chr1	152165258	152166107
chr1	152231729	152232609
chr1	152290733	152291407
chr1	152347374	152348700
chr1	152368349	152370248
chr1	152386112	152386877
chr1	152524720	152525655
chr1	152624577	152625496
chr1	152640487	152641173
chr1	152746442	152747086
chr1	152765805	152767693
chr1	152765805	152767693
chr1	152768018	152768641
chr1	152815147	152815607
chr1	152901808	152902688
chr1	152901808	152902688
chr1	152902765	152904021
chr1	152904417	152904979
chr1	152954861	152955413
chr1	152955543	152957196
chr1	152955543	152957196
chr1	152999935	153001189
chr1	153034829	153037122
chr1	153039987	153041011
chr1	153047744	153048738
chr1	153065411	153066081
chr1	153066170	153066764
chr1	153084100	153085009
chr1	153091407	153093025
chr1	153101090	153101949
chr1	153331677	153334148
chr1	153331677	153334148
chr1	153386625	153387451
chr1	153401755	153402198
chr1	153424974	153425718
chr1	153451074	153451628
chr1	153486292	153488641
chr1	153486292	153488641
chr1	153556866	153557708
chr1	153558516	153560168
chr1	153652772	153653801
chr1	153665070	153666933
chr1	153742380	153743250
chr1	153746399	153747729
chr1	153749184	153749775
chr1	153894833	153895515
chr1	153899416	153900805
chr1	153899416	153900805
chr1	154118234	154119021
chr1	154180925	154181767
chr1	154281353	154281987
chr1	154461407	154461976
chr1	154726514	154727179
chr1	154729308	154729976
chr1	154784632	154786783
chr1	154787040	154789509
chr1	154787040	154789509
chr1	154791380	154792605
chr1	154796646	154797124
chr1	154861049	154862592
chr1	154982845	154983752
chr1	155004858	155007751
chr1	155025691	155026476
chr1	155038827	155039654
chr1	155048548	155049827
chr1	155062838	155063492
chr1	155082769	155084241
chr1	155082769	155084241
chr1	155097978	155099906
chr1	155097978	155099906
chr1	155139757	155140529
chr1	155158431	155159448
chr1	155217071	155218597
chr1	155223179	155226194
chr1	155233978	155234439
chr1	155243976	155245049
chr1	155281215	155282279
chr1	155293223	155293877
chr1	155416612	155417611
chr1	155516518	155516929
chr1	155537090	155537726
chr1	155557611	155559007
chr1	155575203	155576950
chr1	155575203	155576950
chr1	155784591	155785593
chr1	155791924	155792347
chr1	155855286	155855778
chr1	155972409	155974430
chr1	155972409	155974430
chr1	156035386	156036953
chr1	156035386	156036953
chr1	156035386	156036953
chr1	156040628	156041162
chr1	156043017	156043455
chr1	156085754	156086302
chr1	156241713	156242297
chr1	156263176	156263721
chr1	156420587	156420986
chr1	156473847	156474491
chr1	156558014	156559748
chr1	156558014	156559748
chr1	156558014	156559748
chr1	156633006	156634135
chr1	156640333	156640981
chr1	156657551	156659346
chr1	156673372	156674781
chr1	156676177	156676611
chr1	156717919	156718890
chr1	156718977	156719691
chr1	156741671	156742746
chr1	156752091	156752843
chr1	156917477	156917821
chr1	156938617	156939200
chr1	156939675	156940471
chr1	157076079	157077742
chr1	157076079	157077742
chr1	157076079	157077742
chr1	157086096	157086441
chr1	157411601	157413092
chr1	157411601	157413092
chr1	157446313	157446922
chr1	157458307	157458627
chr1	157536385	157537276
chr1	157552474	157554542
chr1	157560493	157561290
chr1	157745600	157746034
chr1	158310328	158311180
chr1	158355089	158356689
chr1	158362519	158363320
chr1	158510243	158511380
chr1	158653908	158654931
chr1	158653908	158654931
chr1	158670019	158670761
chr1	158713323	158713699
chr1	158953457	158954362
chr1	159135235	159135746
chr1	159231493	159233354
chr1	159231493	159233354
chr1	159231493	159233354
chr1	159389543	159390465
chr1	159396125	159397074
chr1	159523116	159524813
chr1	159783479	159784286
chr1	159911005	159911420
chr1	160080818	160081552
chr1	160184446	160184891
chr1	160194317	160195833
chr1	160212016	160213888
chr1	160212016	160213888
chr1	160230925	160231390
chr1	160351820	160352298
chr1	160377420	160378212
chr1	160399443	160399843
chr1	160410691	160411236
chr1	160531441	160531772
chr1	160714687	160715068
chr1	160743240	160743943
chr1	160791991	160793268
chr1	160791991	160793268
chr1	160905981	160907544
chr1	160905981	160907544
chr1	160933969	160934649
chr1	161034225	161035942
chr1	161034225	161035942
chr1	161069981	161071322
chr1	161130924	161131722
chr1	161170544	161171081
chr1	161195374	161196530
chr1	161250637	161251202
chr1	161286721	161287147
chr1	161400049	161400545
chr1	161687496	161687943
chr1	161727384	161727753
chr1	161875813	161877370
chr1	161875813	161877370
chr1	161968650	161969579
chr1	161976058	161977386
chr1	161999489	162000428
chr1	162313559	162314230
chr1	162357707	162360172
chr1	162357707	162360172
chr1	162477274	162478695
chr1	162549645	162550398
chr1	162570147	162571622
chr1	162664976	162665438
chr1	162739593	162741192
chr1	162739593	162741192
chr1	163150370	163150819
chr1	163403328	163404339
chr1	163778977	163780283
chr1	163910309	163910974
chr1	163928982	163930839
chr1	163994346	163995622
chr1	164138495	164139107
chr1	164184211	164184980
chr1	164247873	164249870
chr1	164247873	164249870
chr1	164247873	164249870
chr1	164275392	164275976
chr1	164316270	164317854
chr1	164366546	164367105
chr1	164455602	164459507
chr1	164455602	164459507
chr1	164455602	164459507
chr1	164455602	164459507
chr1	164744991	164745355
chr1	164787587	164788221
chr1	164898479	164900005
chr1	164904969	164905510
chr1	165035486	165036151
chr1	165120156	165121148
chr1	165132219	165133082
chr1	165236271	165237576
chr1	165251961	165252818
chr1	165320392	165321112
chr1	165459429	165461972
chr1	165459429	165461972
chr1	165459429	165461972
chr1	165583451	165584813
chr1	165631033	165631588
chr1	165633709	165635304
chr1	165641142	165643275
chr1	165641142	165643275
chr1	165641142	165643275
chr1	165641142	165643275
chr1	165658107	165659569
chr1	165660237	165661480
chr1	165735673	165736683
chr1	165763487	165764718
chr1	165771020	165772005
chr1	165774984	165776057
chr1	165780271	165781275
chr1	165853224	165854279
chr1	165967073	165967489
chr1	166000570	166001938
chr1	166002265	166003840
chr1	166002265	166003840
chr1	166002265	166003840
chr1	166152378	166155583
chr1	166152378	166155583
chr1	166160397	166161396
chr1	166253803	166254277
chr1	166308715	166309661
chr1	166308715	166309661
chr1	166319118	166319567
chr1	166359864	166361403
chr1	166378247	166380296
chr1	166378247	166380296
chr1	166378247	166380296
chr1	166409133	166410183
chr1	166409133	166410183
chr1	166428968	166429431
chr1	166738014	166738411
chr1	166782083	166782544
chr1	166794339	166795260
chr1	166800686	166801880
chr1	167000313	167003022
chr1	167000313	167003022
chr1	167000313	167003022
chr1	167000313	167003022
chr1	167069535	167070296
chr1	167212179	167212875
chr1	167220426	167221275
chr1	167269761	167270381
chr1	167283575	167285749
chr1	167283575	167285749
chr1	167308091	167309138
chr1	167308091	167309138
chr1	167337160	167338024
chr1	167349460	167350734
chr1	167349460	167350734
chr1	167369374	167370675
chr1	167392599	167394876
chr1	167414438	167415444
chr1	167636888	167637628
chr1	167638057	167638475
chr1	167644831	167645425
chr1	167669725	167670188
chr1	168213718	168215192
chr1	168322636	168323504
chr1	168432299	168432710
chr1	169459133	169459841
chr1	169495666	169496173
chr1	169517301	169518539
chr1	169517301	169518539
chr1	169531216	169532562
chr1	169531216	169532562
chr1	169919109	169919615
chr1	169921606	169922050
chr1	169933860	169934761
chr1	169968901	169969859
chr1	170136318	170136930
chr1	170174213	170175918
chr1	170174213	170175918
chr1	170214603	170215795
chr1	170255146	170255980
chr1	170292405	170293185
chr1	170589012	170590197
chr1	170589012	170590197
chr1	170612905	170613812
chr1	170632193	170632827
chr1	170867320	170868036
chr1	170884875	170885854
chr1	170900816	170902362
chr1	170907288	170908904
chr1	170996763	170997226
chr1	171037827	171038845
chr1	171039068	171039515
chr1	171043705	171045202
chr1	171070302	171070934
chr1	171071239	171073161
chr1	171077953	171078464
chr1	171078958	171080650
chr1	171101665	171103698
chr1	171101665	171103698
chr1	171110245	171111704
chr1	171118318	171119034
chr1	171149931	171151623
chr1	171149931	171151623
chr1	171220474	171223535
chr1	171220474	171223535
chr1	171220474	171223535
chr1	171238327	171239312
chr1	171246547	171247999
chr1	171256717	171258523
chr1	171269853	171271112
chr1	171269853	171271112
chr1	171280300	171282362
chr1	171286478	171288552
chr1	171293900	171295319
chr1	171328311	171329980
chr1	171328311	171329980
chr1	171344848	171346202
chr1	171358272	171359507
chr1	171360131	171361891
chr1	171379616	171380570
chr1	171410657	171412575
chr1	171410657	171412575
chr1	171437165	171437812
chr1	171469932	171470733
chr1	171478790	171479627
chr1	171503077	171504406
chr1	171552289	171552794
chr1	171564104	171564736
chr1	171566662	171567289
chr1	171673012	171673408
chr1	171699043	171699408
chr1	172011548	172013035
chr1	172026344	172027938
chr1	172026344	172027938
chr1	172046428	172047629
chr1	172082089	172083461
chr1	172082089	172083461
chr1	172119196	172120201
chr1	172126408	172127130
chr1	172143420	172143963
chr1	172147715	172149348
chr1	172161939	172162532
chr1	172204550	172207636
chr1	172204550	172207636
chr1	172216773	172217811
chr1	172247558	172248130
chr1	172299778	172300554
chr1	172309103	172313484
chr1	172309103	172313484
chr1	172309103	172313484
chr1	172309103	172313484
chr1	172309103	172313484
chr1	172309103	172313484
chr1	172309103	172313484
chr1	172317152	172319030
chr1	172323792	172327796
chr1	172323792	172327796
chr1	172328408	172330313
chr1	172333334	172334141
chr1	172337340	172338364
chr1	172356891	172358325
chr1	172364460	172365283
chr1	172368791	172369194
chr1	172376145	172377439
chr1	172408957	172409428
chr1	172410811	172412967
chr1	172481651	172482461
chr1	172489709	172491371
chr1	172528499	172529277
chr1	172562659	172563825
chr1	172619236	172619728
chr1	172632515	172633718
chr1	173323760	173324411
chr1	173338865	173340538
chr1	173359680	173360322
chr1	173365525	173368331
chr1	173365525	173368331
chr1	173365525	173368331
chr1	173365525	173368331
chr1	173377361	173377954
chr1	174469748	174470220
chr1	174501613	174504340
chr1	174501613	174504340
chr1	174501613	174504340
chr1	174501613	174504340
chr1	174553673	174554249
chr1	174592397	174592958
chr1	174594994	174595412
chr1	174999836	175000167
chr1	175041270	175041840
chr1	175431052	175432236
chr1	175491529	175493147
chr1	175491529	175493147
chr1	175624804	175626502
chr1	175624804	175626502
chr1	175668950	175669553
chr1	175691996	175693049
[truncated: 37,783 more rows]
